# Supplementary material for: Autophagy in the Thymic Epithelium Is Dispensable for the Development of Self-Tolerance in a Novel Mouse Model
Source: PubMed Central journal article supplement (PMC3377705; doi:10.1371/journal.pone.0038933), 2012-06-18

**A**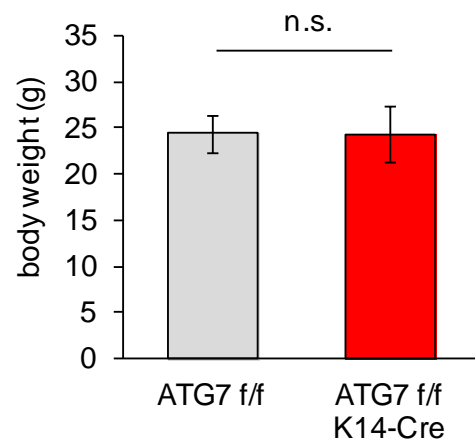**B**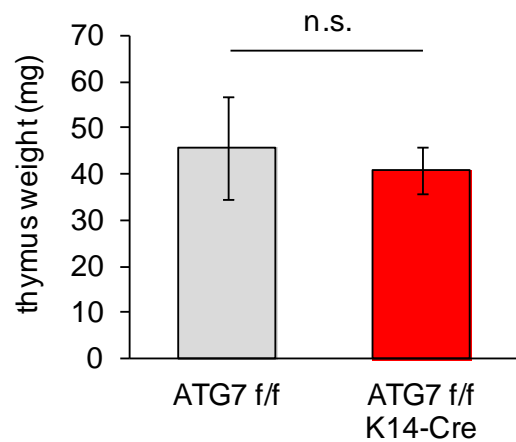**C**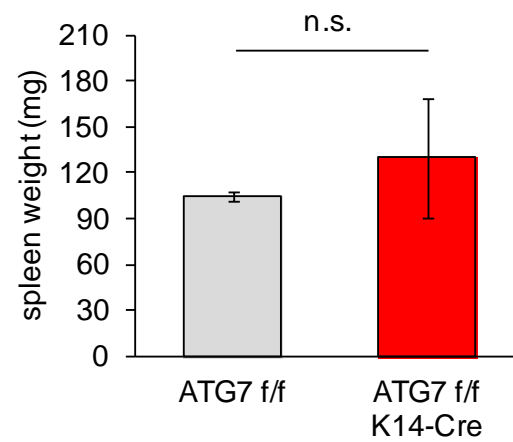**D**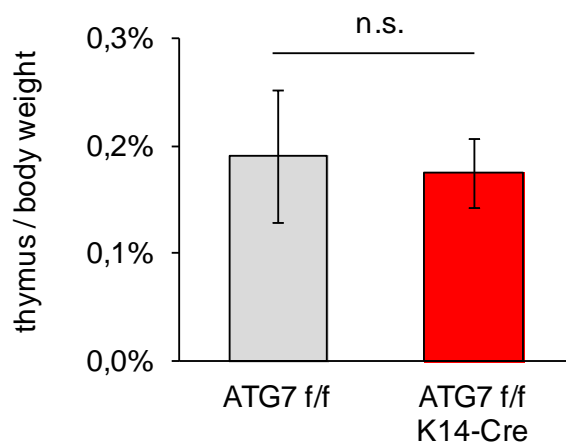**E**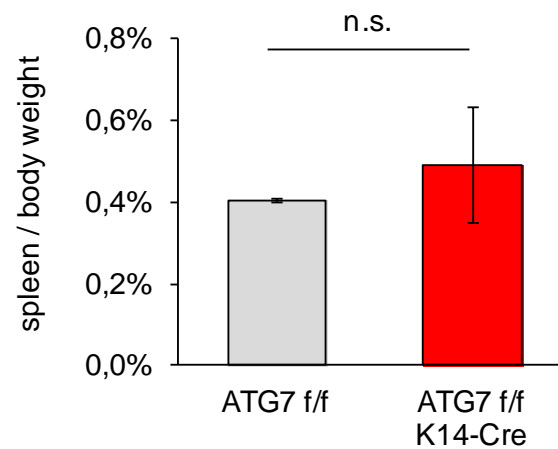

Supplement: pone.0038933.s001.pdf [file pone.0038933.s001.pdf]
