# Supplementary material for: Autophagy in the Thymic Epithelium Is Dispensable for the Development of Self-Tolerance in a Novel Mouse Model
Source: PubMed Central journal article supplement (PMC3377705; doi:10.1371/journal.pone.0038933), 2012-06-18

**A**

ATG7 f/f

ATG7 f/f, K14-Cre

2 months

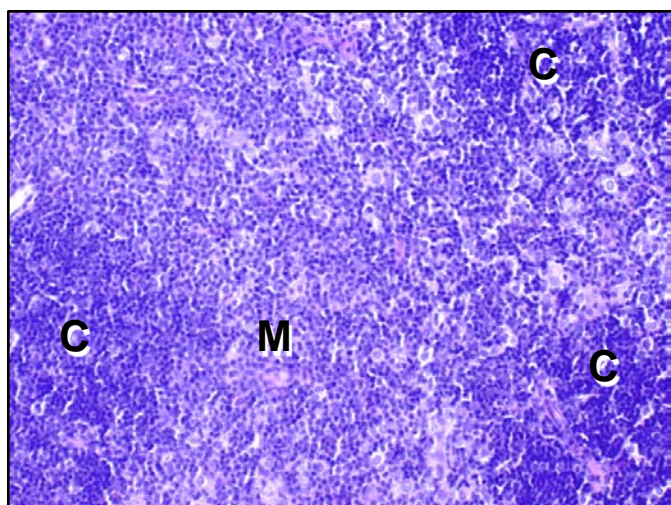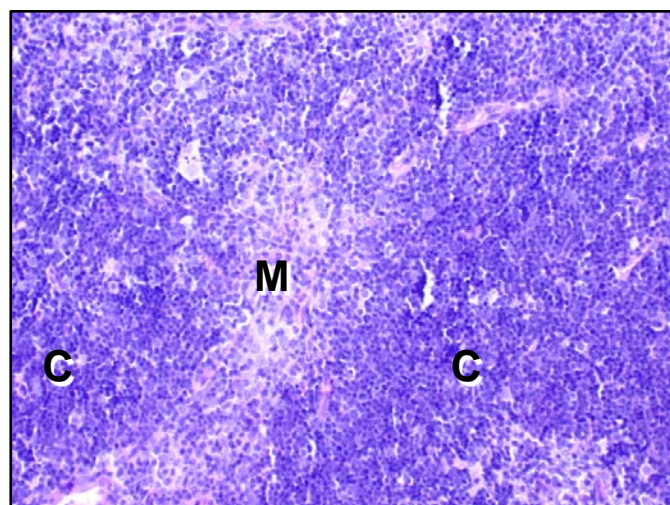**B**

ATG7 f/f

ATG7 f/f, K14-Cre

20 months

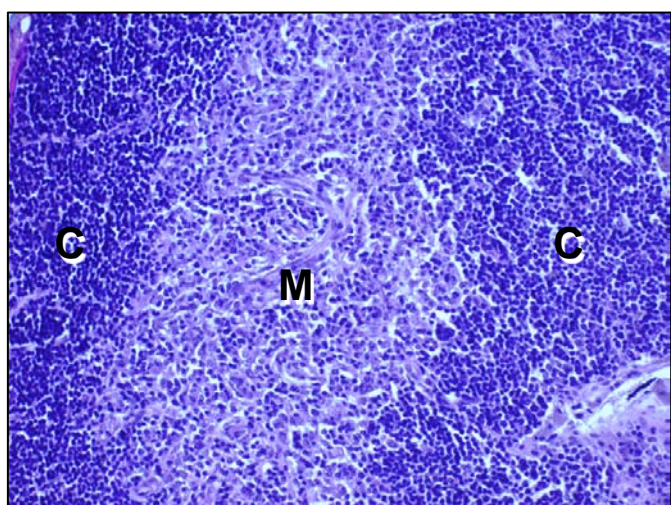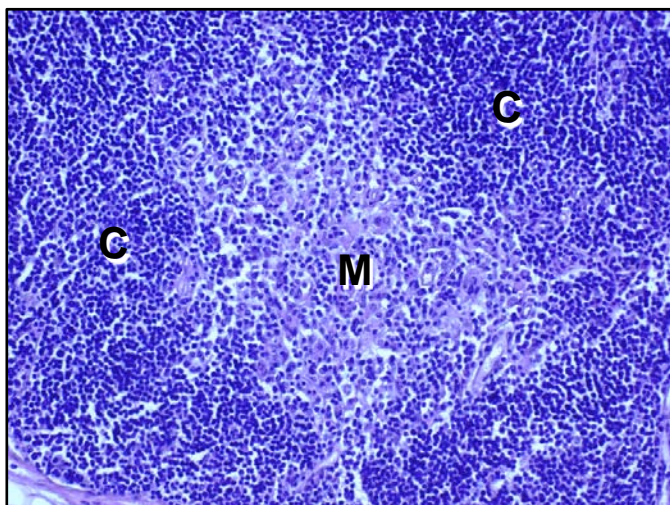**C**

ATG7 f/f

ATG7 f/f, K14-Cre

K5  
K8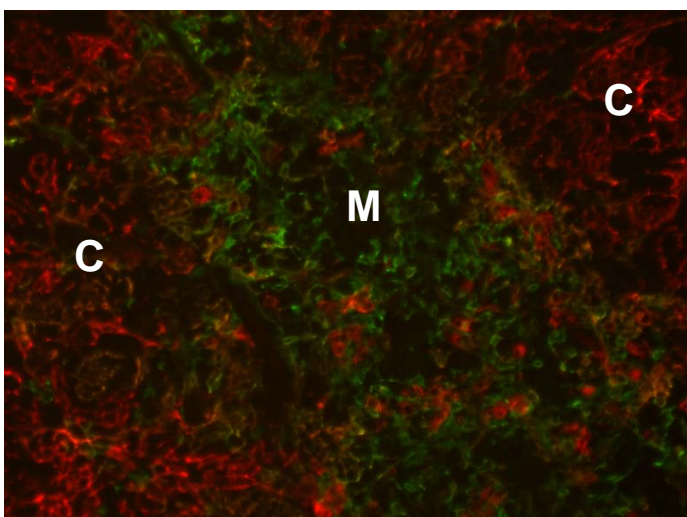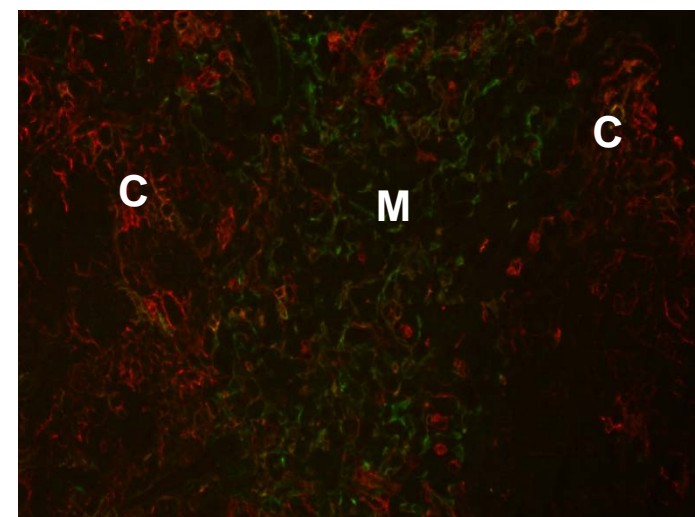K5  
K8  
DNA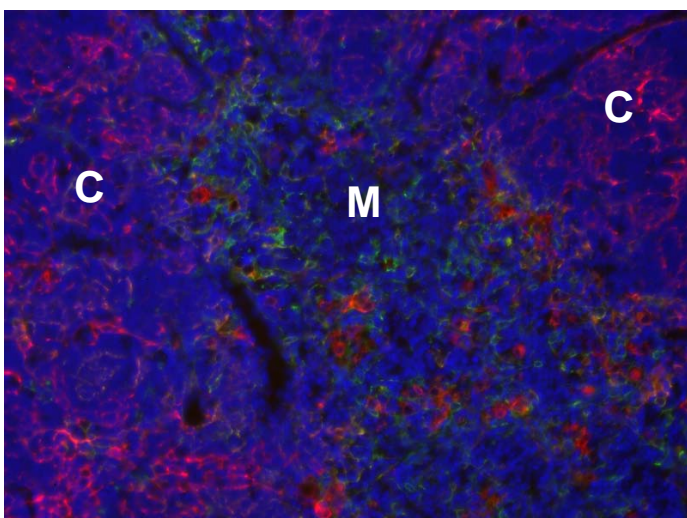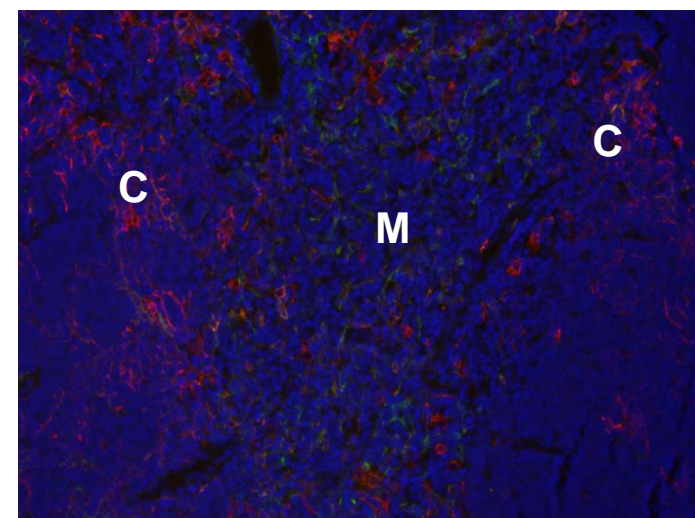

Supplement: pone.0038933.s002.pdf [file pone.0038933.s002.pdf]
