# Supplementary material for: Autophagy in the Thymic Epithelium Is Dispensable for the Development of Self-Tolerance in a Novel Mouse Model
Source: PubMed Central journal article supplement (PMC3377705; doi:10.1371/journal.pone.0038933), 2012-06-18

**ATG7 f/f**

**ATG7 f/f, K14-Cre**

**Colon**

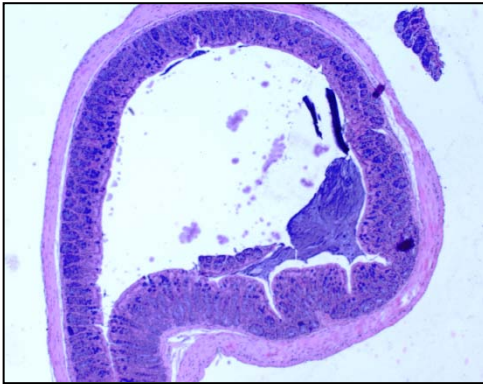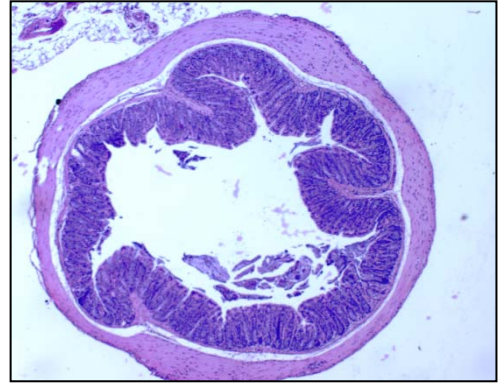

**Liver**

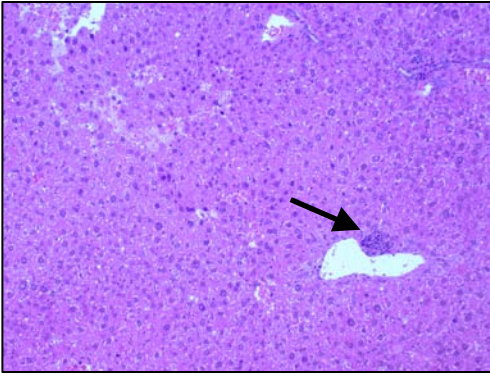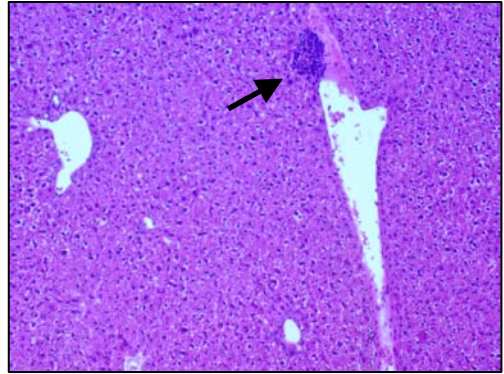

**Lung**

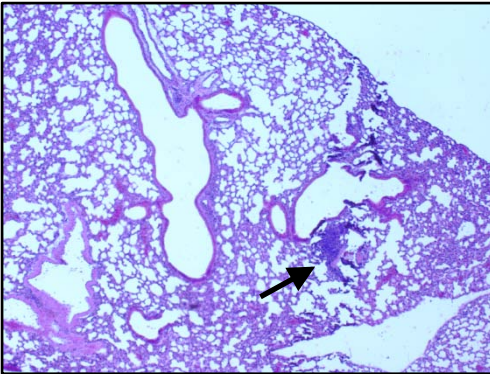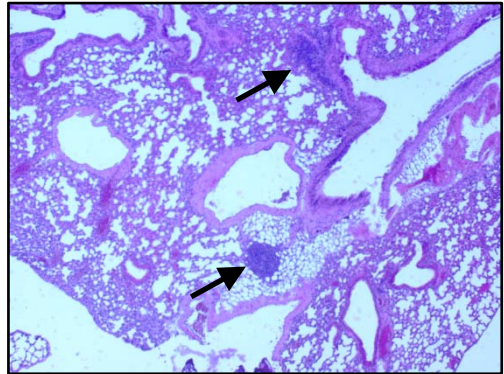

**Uterus**

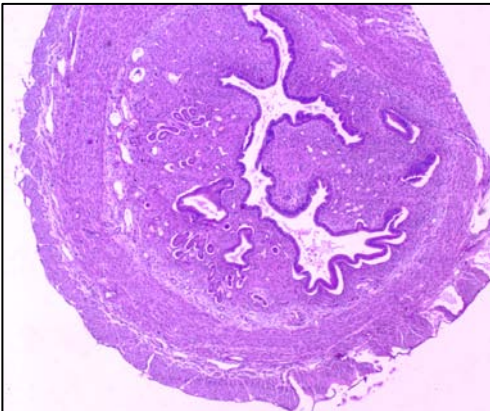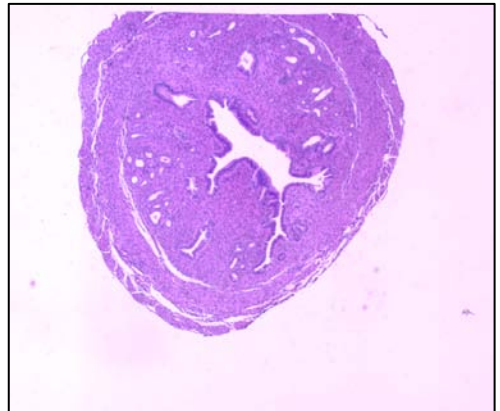

Supplement: pone.0038933.s004.pdf [file pone.0038933.s004.pdf]
